# Supplementary material
Source: publisher figshare collection journal article supplement (https://acs.figshare.com/ndownloader/files/10628551)
Supplement: Supplementary file 1 [file 10628551]

**Supplementary Information**

**Primary and higher order structure of the reaction center from the purple phototrophic bacterium *Blastochloris viridis:* A test for native mass spectrometry**

Yue Lu1,2, Carrie Goodson2,3, Robert E. Blankenship1,2,3*, Michael L. Gross1,2*

1 Department of Chemistry, Washington University in St. Louis, St. Louis, MO 63130, USA

2 Photosynthetic Antenna Research Center, Washington University in St. Louis, St. Louis, Missouri 63130, USA

3 Department of Biology, Washington University in St. Louis, St. Louis, MO 63130, USA

**Table of contents**

**1. Supplementary Figure S1. Product-ion (MS/MS) spectra of peptides of the photoreaction center isolated from *B. viridis* with a score of lgP > 80, De novo only ALC (%) > 80. The fragment ion assignment was performed by using PEAKS software.**

**2. Supplementary Figure S2. Product-ion (MS/MS) spectra of de novo tag of C-terminal on M subunit. The fragment ion assignment was performed by using PEAKS software.**

**3. Supplementary Figure S3. Protein coverage map generated by PEAKS software. (a) P06008|RCEH_BLAVI (b) P06009|RCEL_BLAVI (c) P07173|CYCR_BLAVI (d) P07173|CYCR_BLAVI.**

**4. Supplementary Table S1. Protein lists generated by PEAKS software.**

**5. Supplementary Table S2. Theoretical MW, experimental MW and pigment component for all the peaks series identified in figure 4a (a) and 4b (b).**

# **Figure S1. Product-ion (MS/MS) spectra of peptides of the photoreaction center isolated from B. viridis with a score of lg > 80, De novo only ALC (%) > 80. The fragment ion assignments were performed by using PEAKS software.**


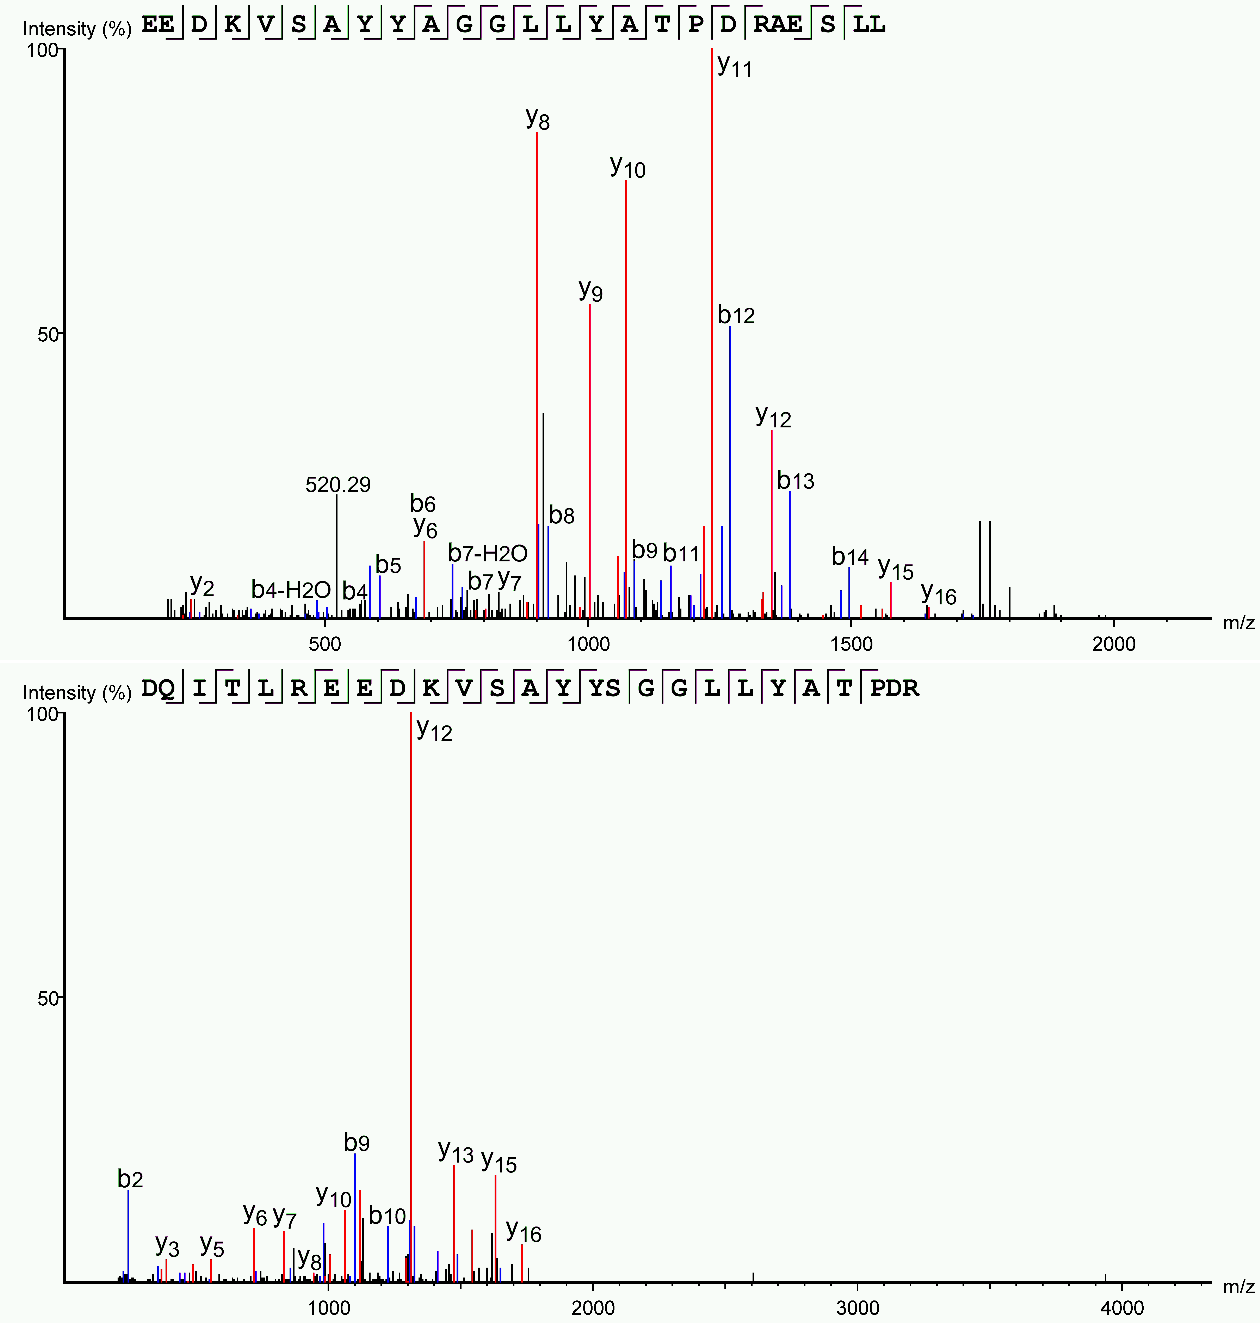


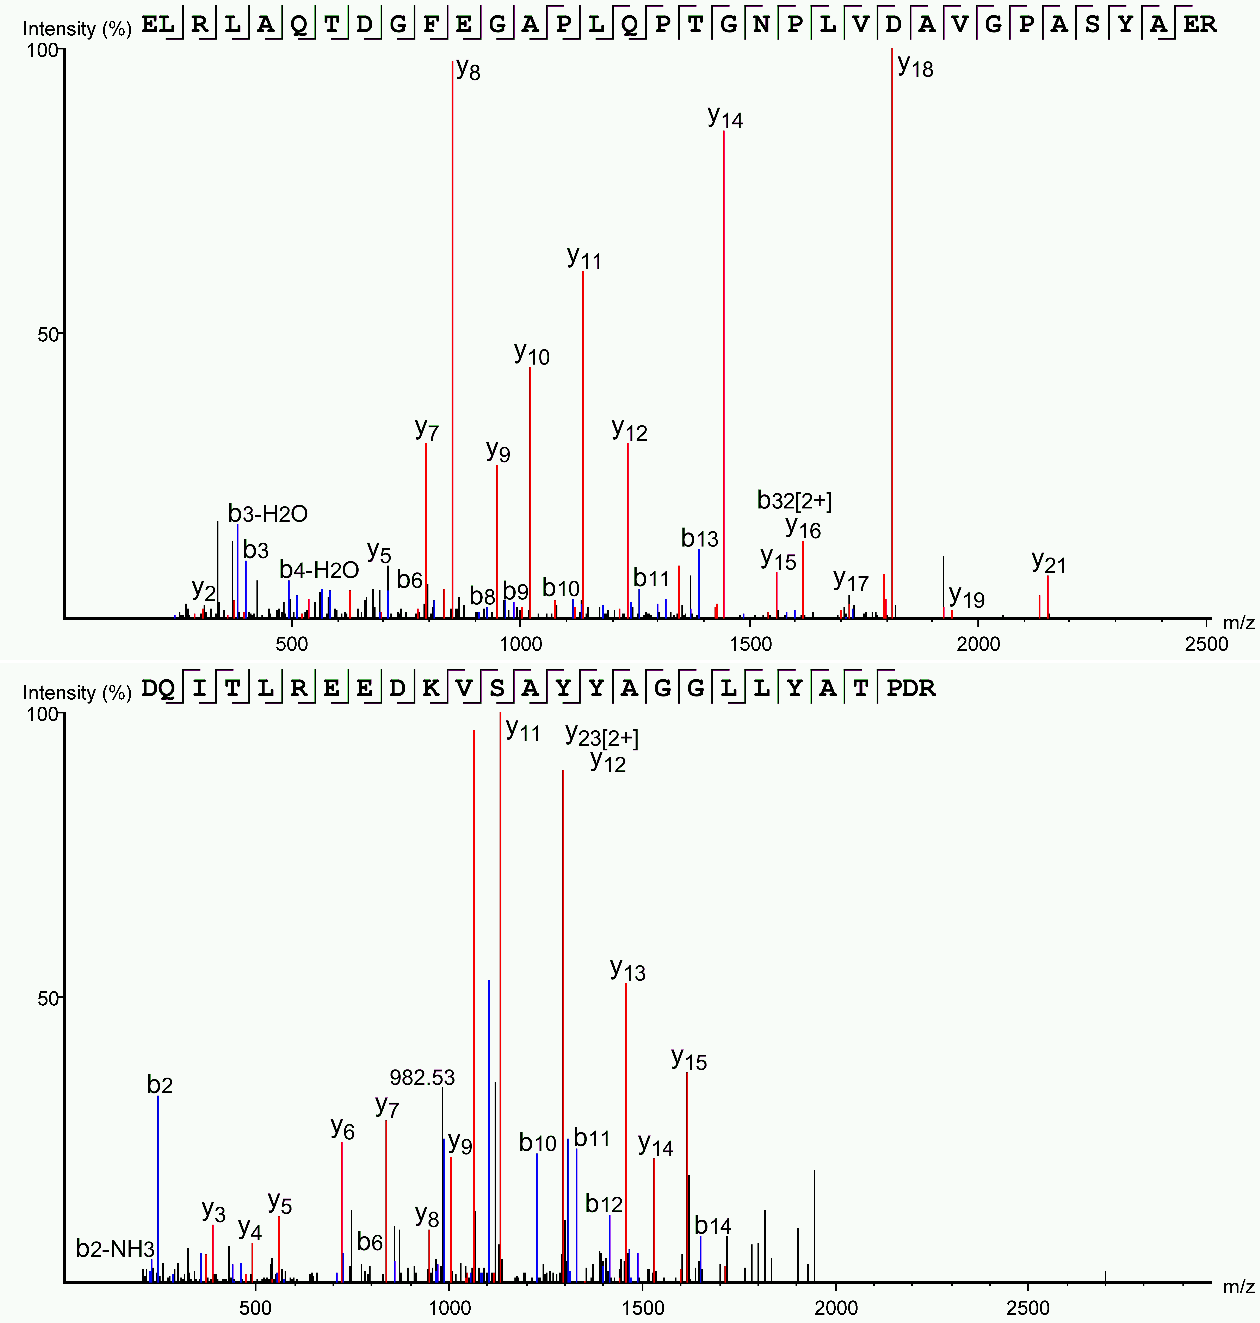


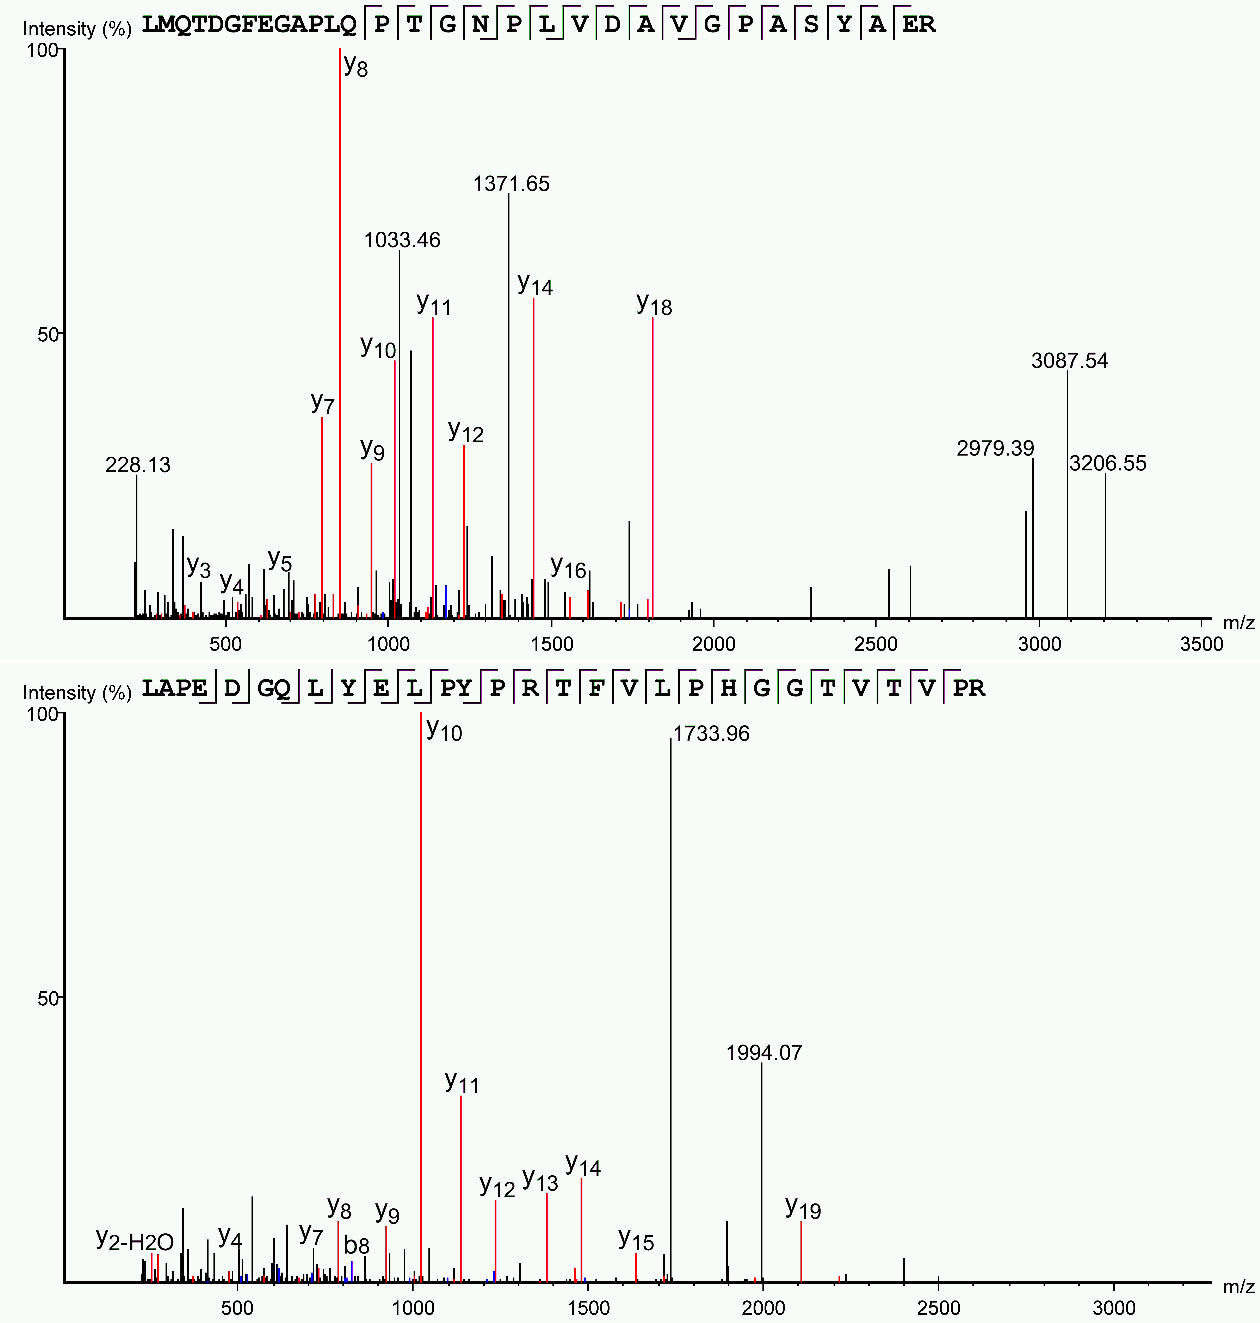


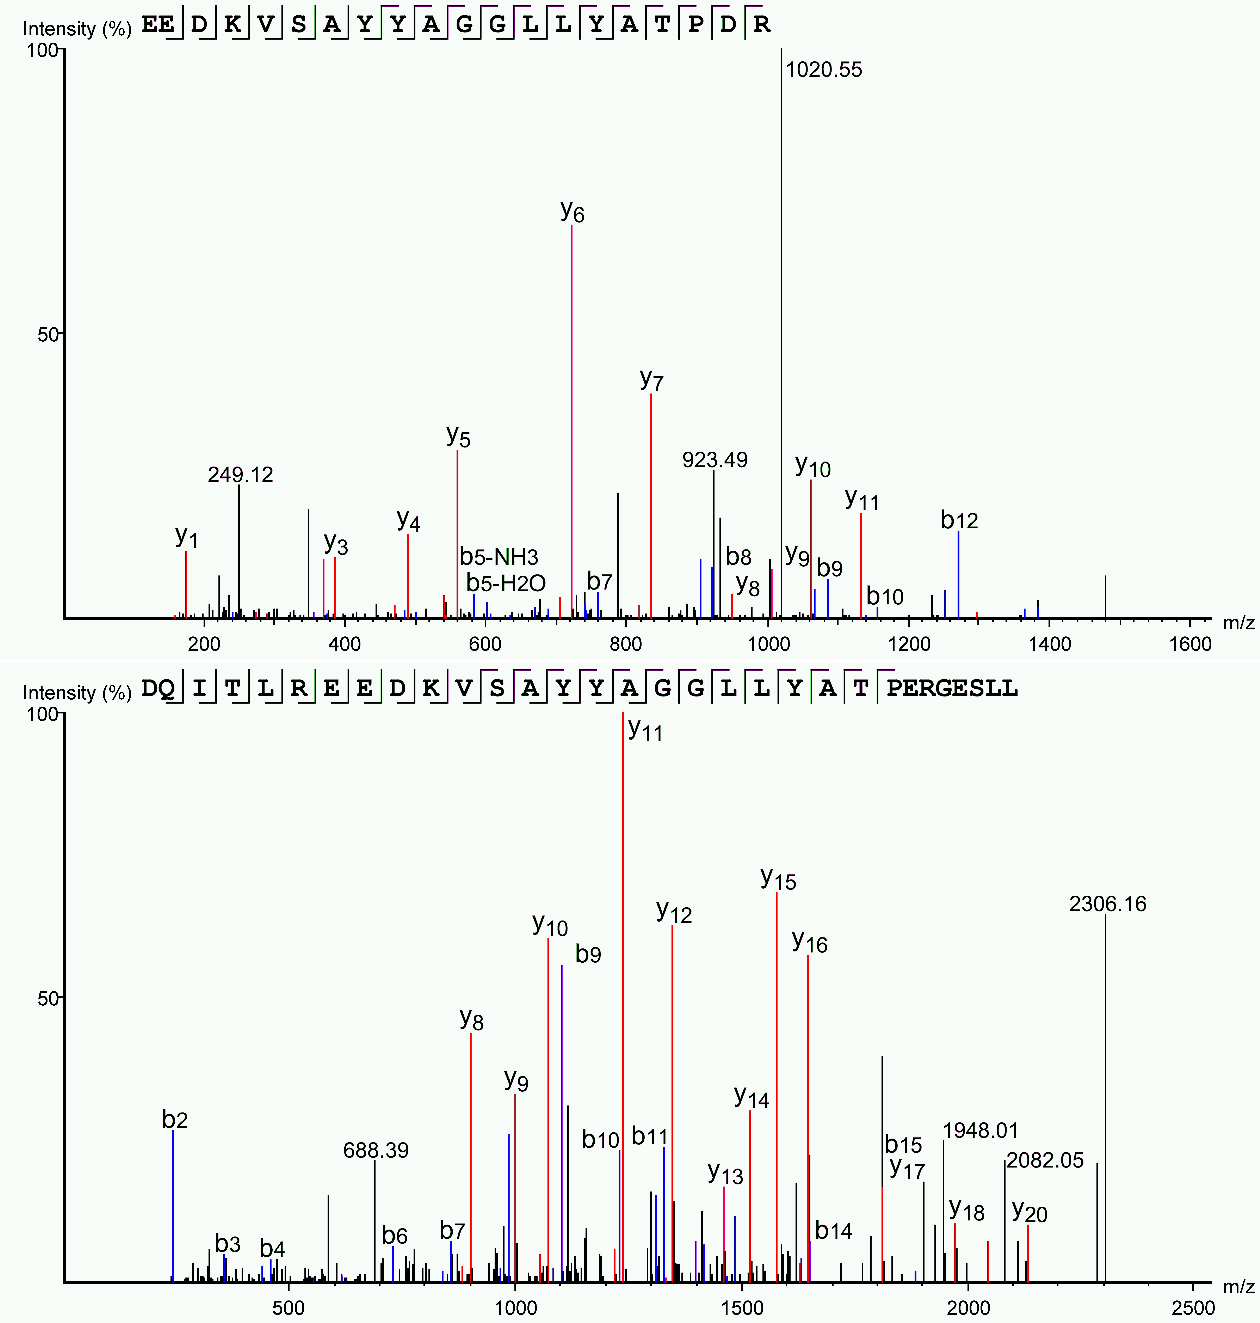


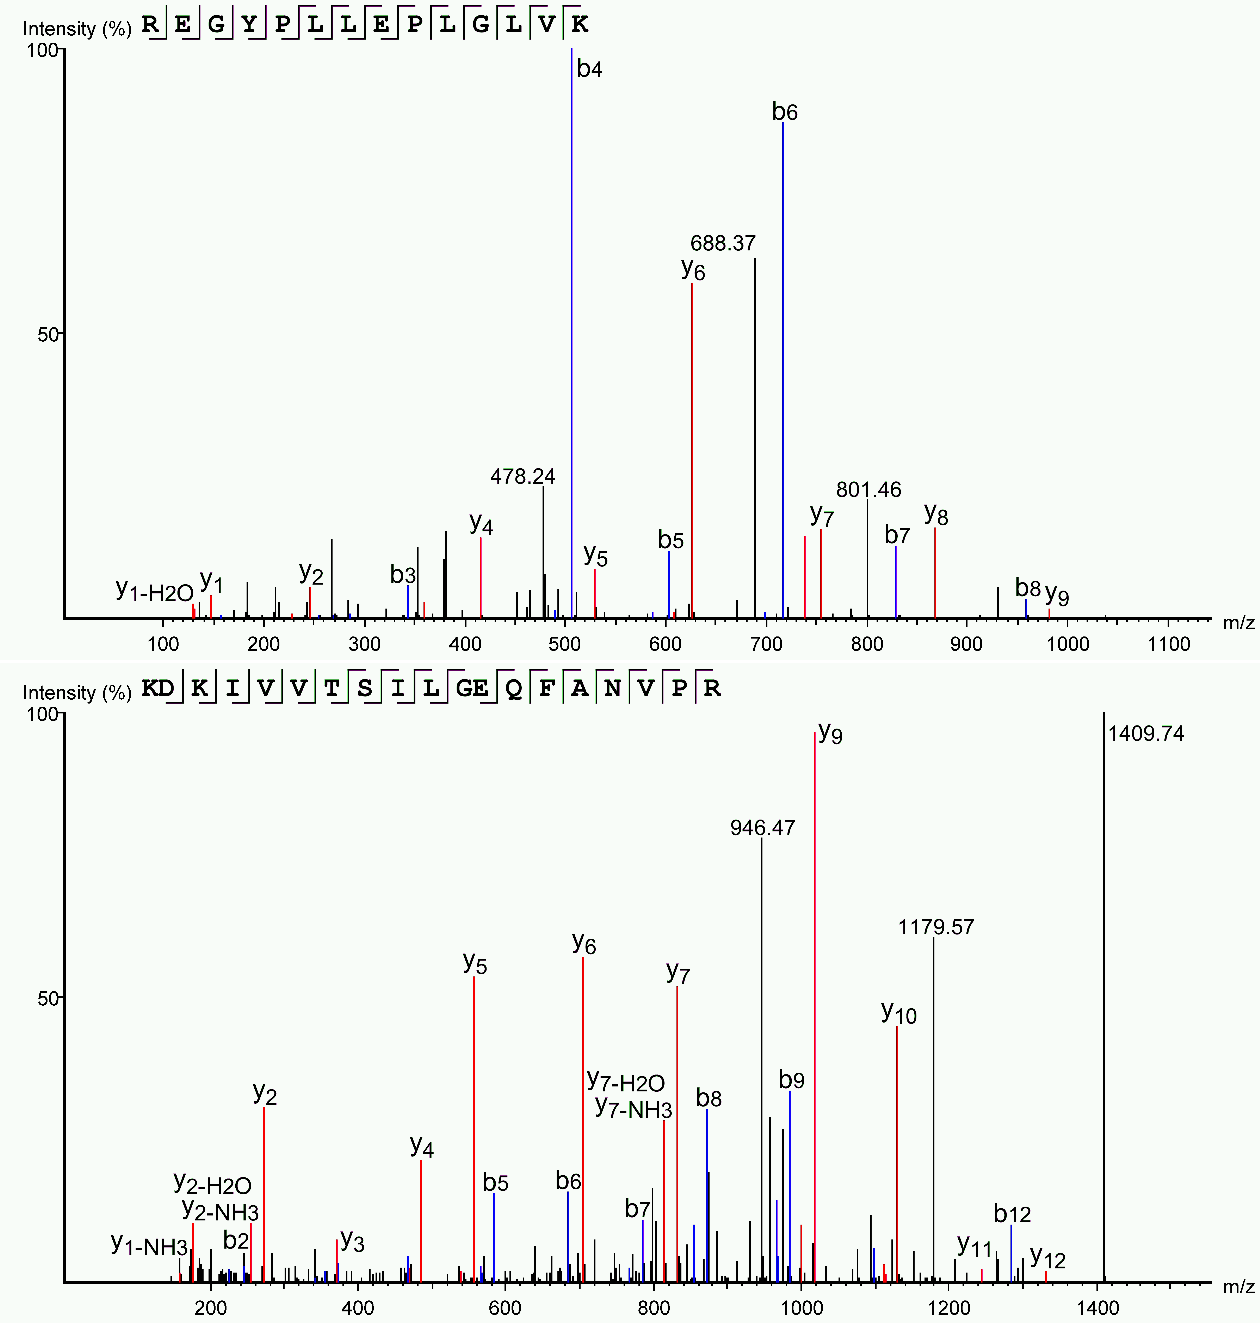


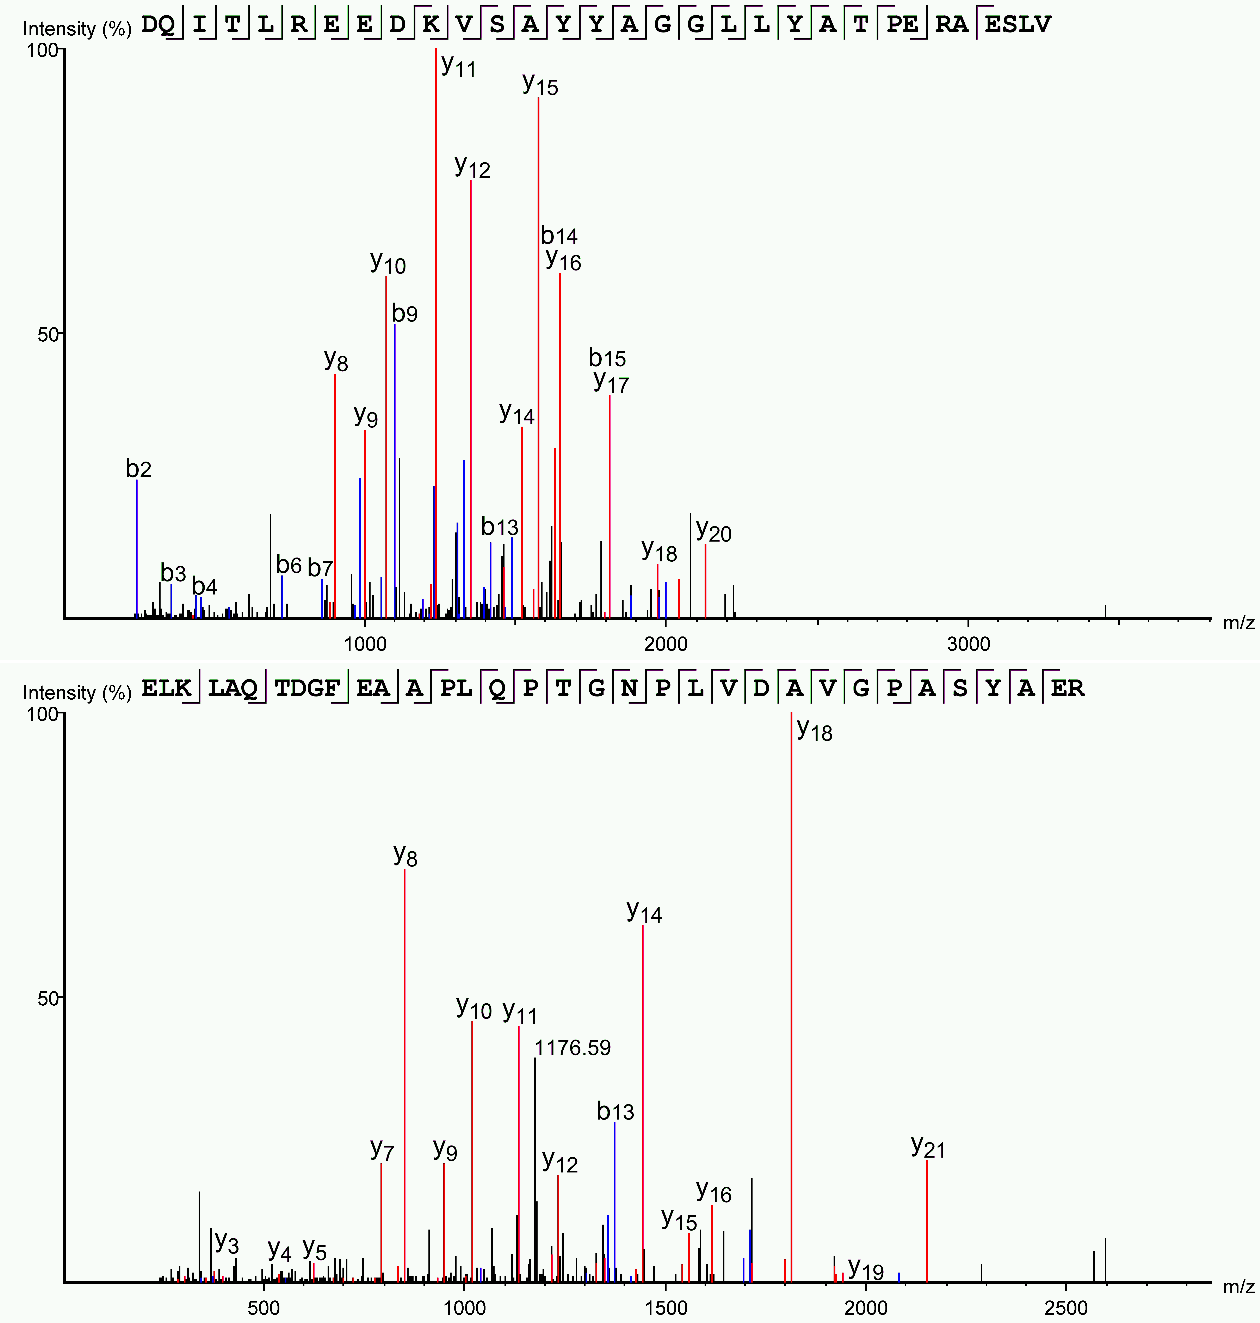


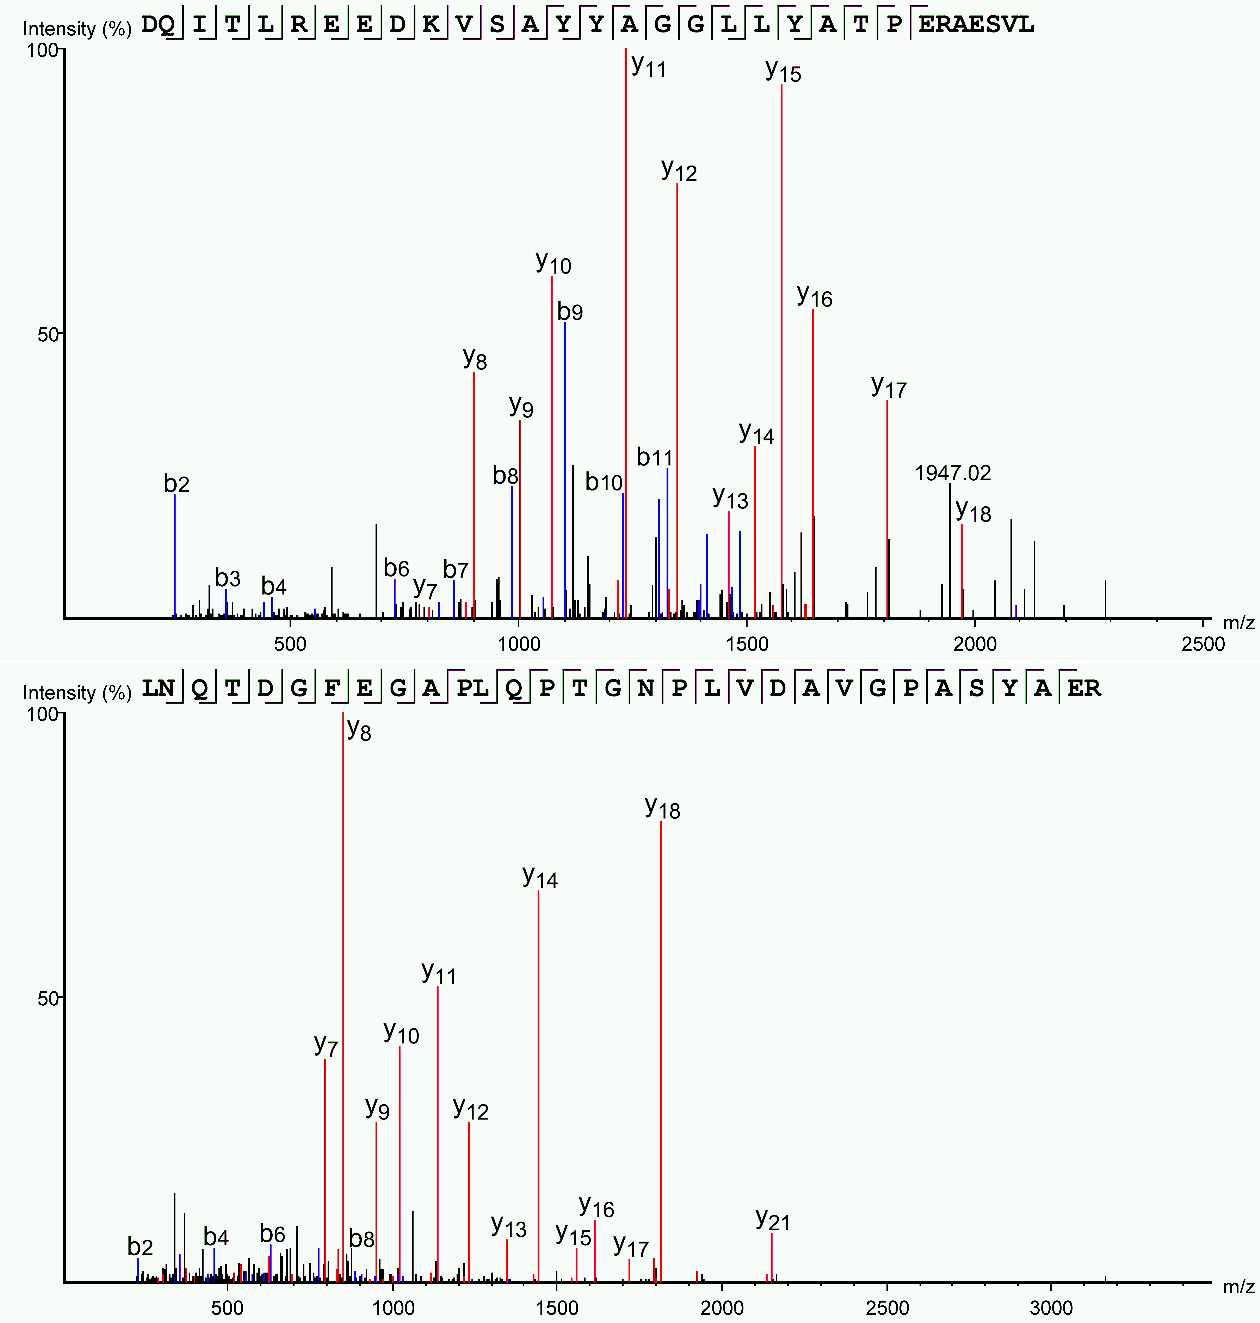


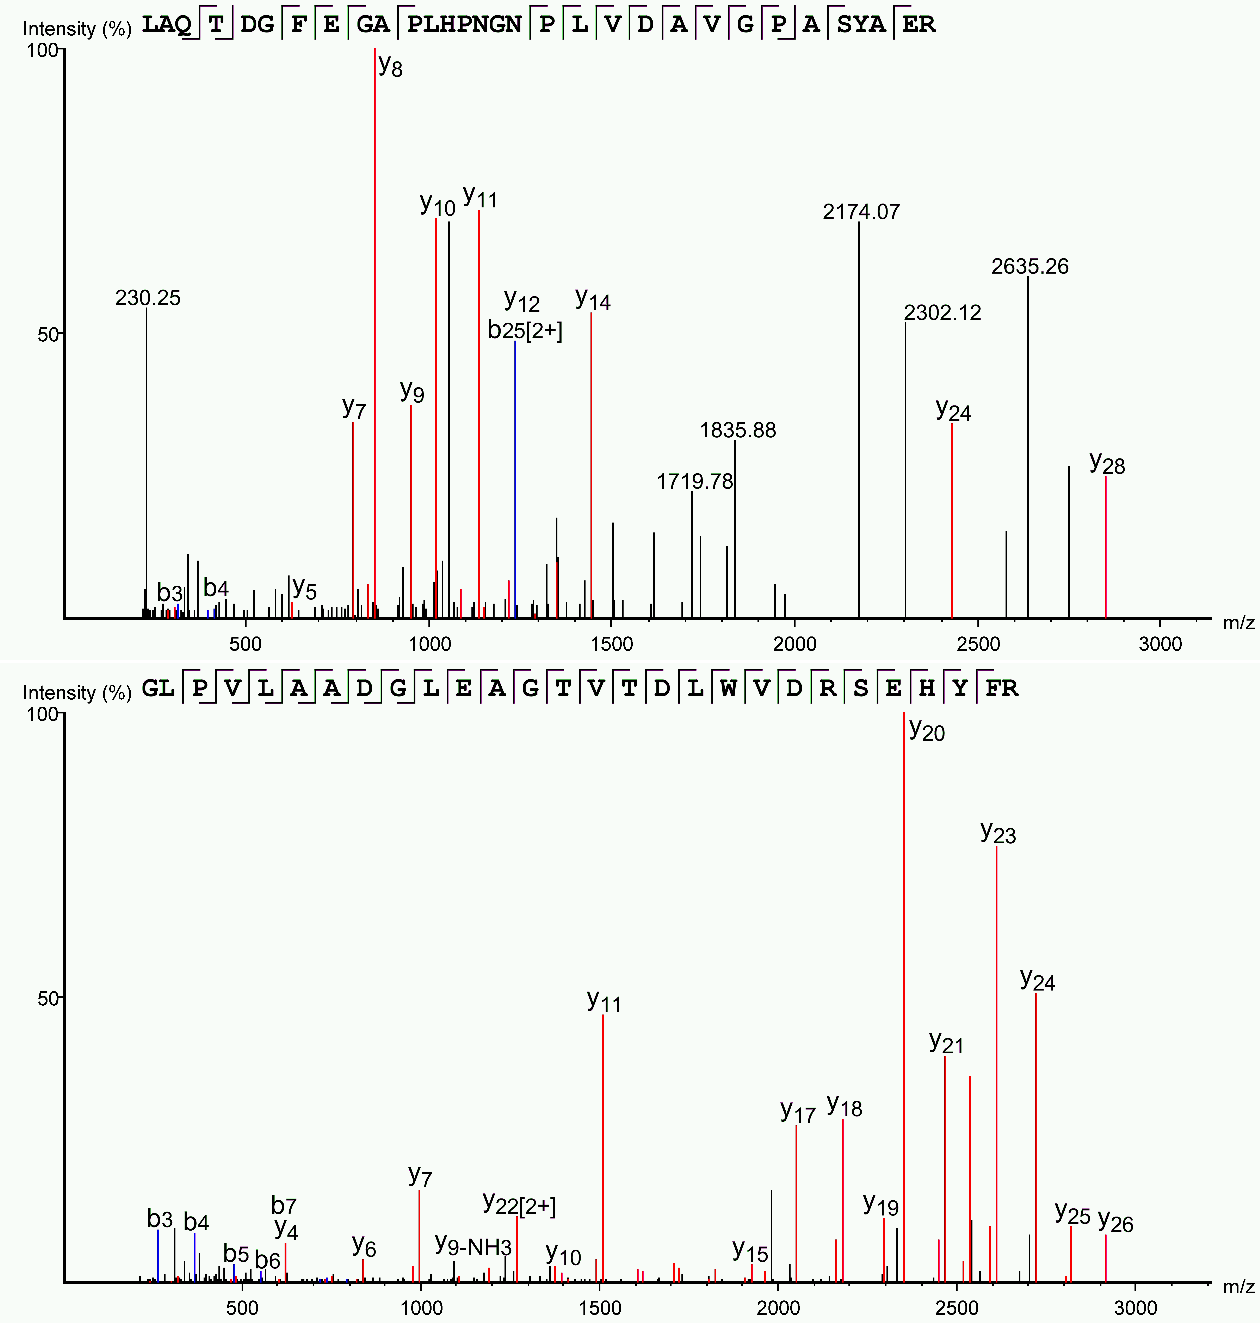


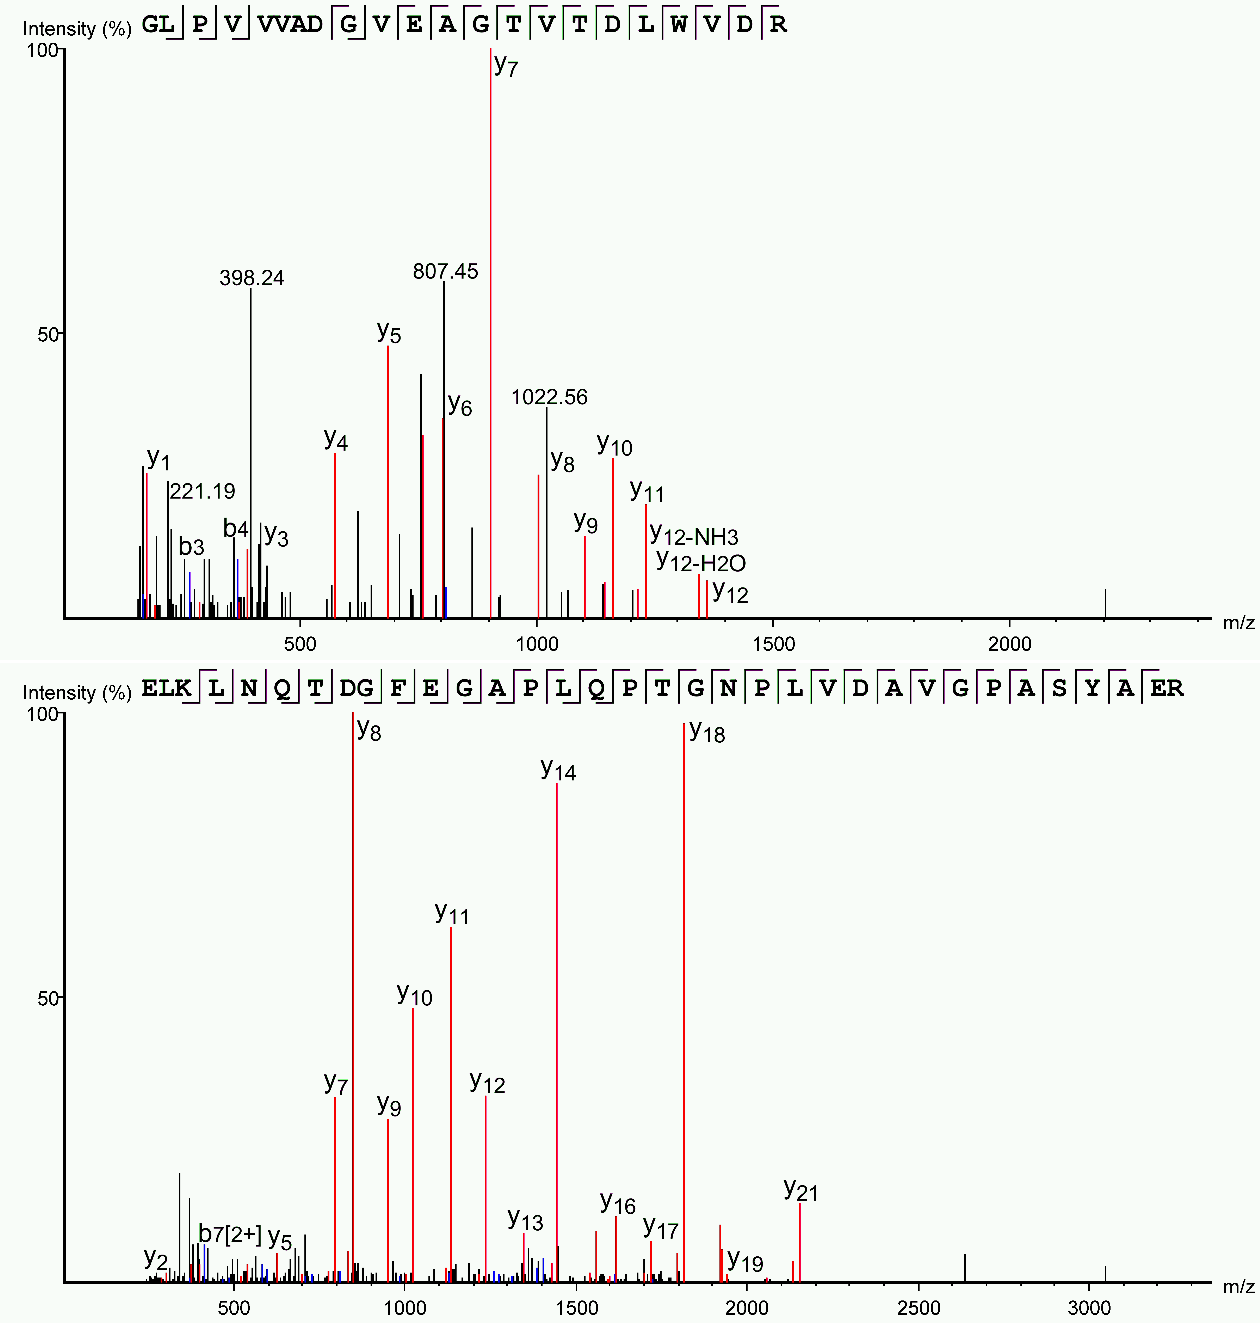


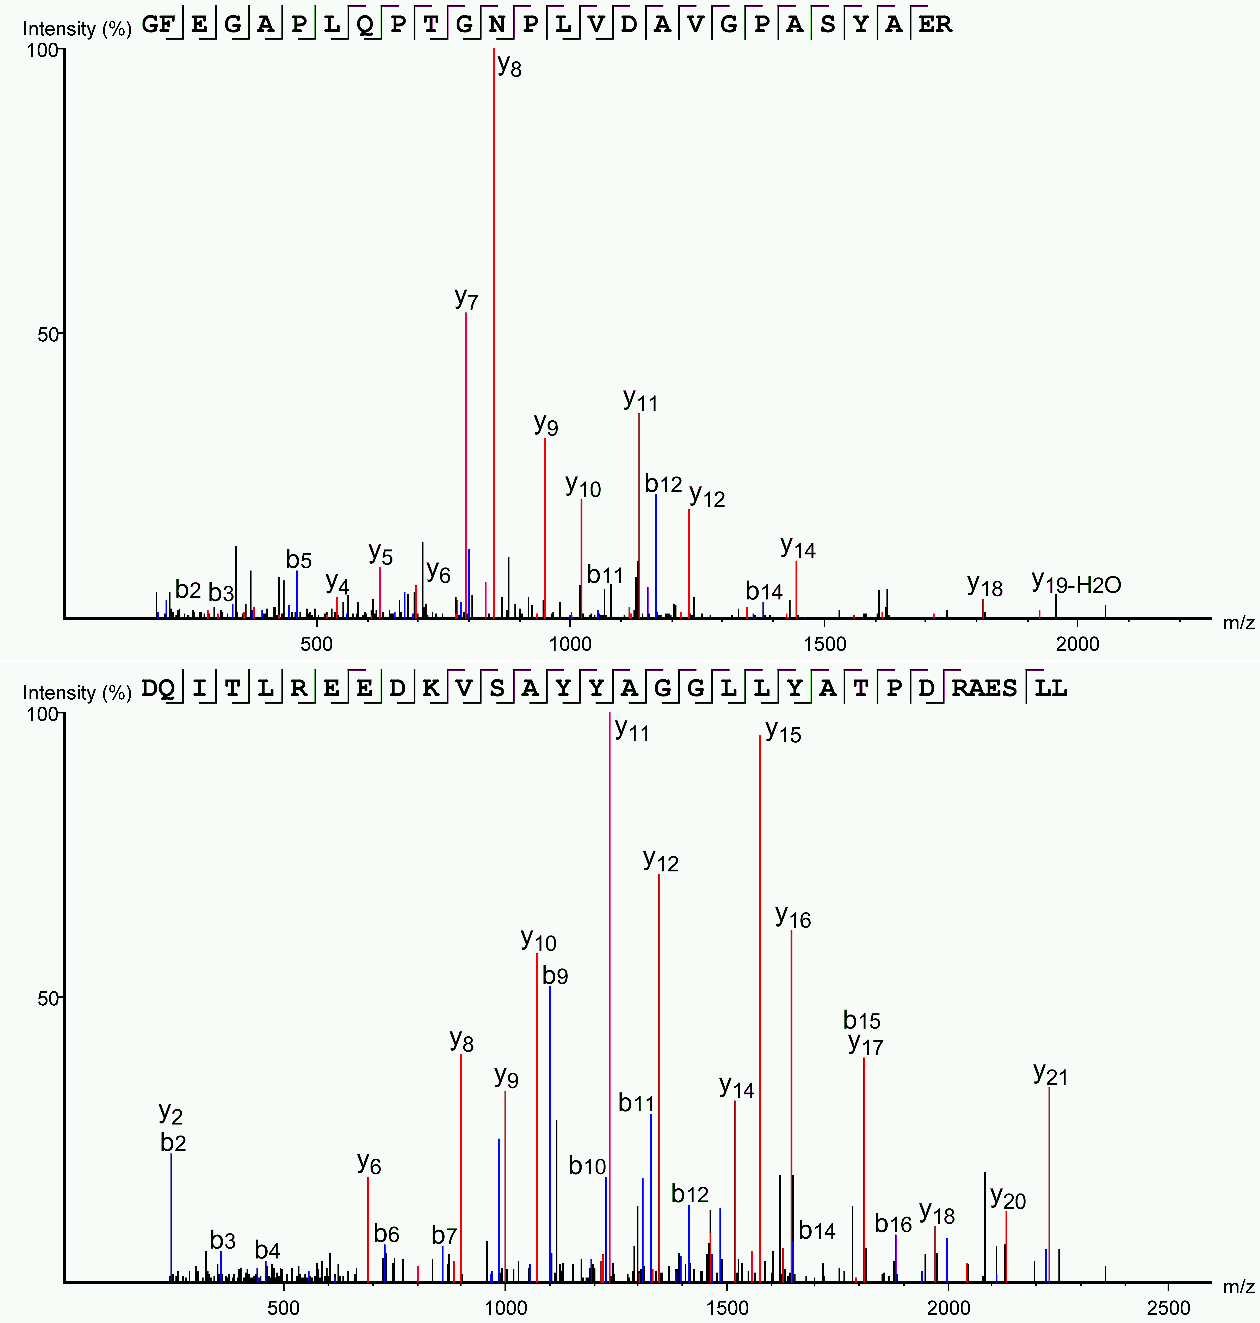


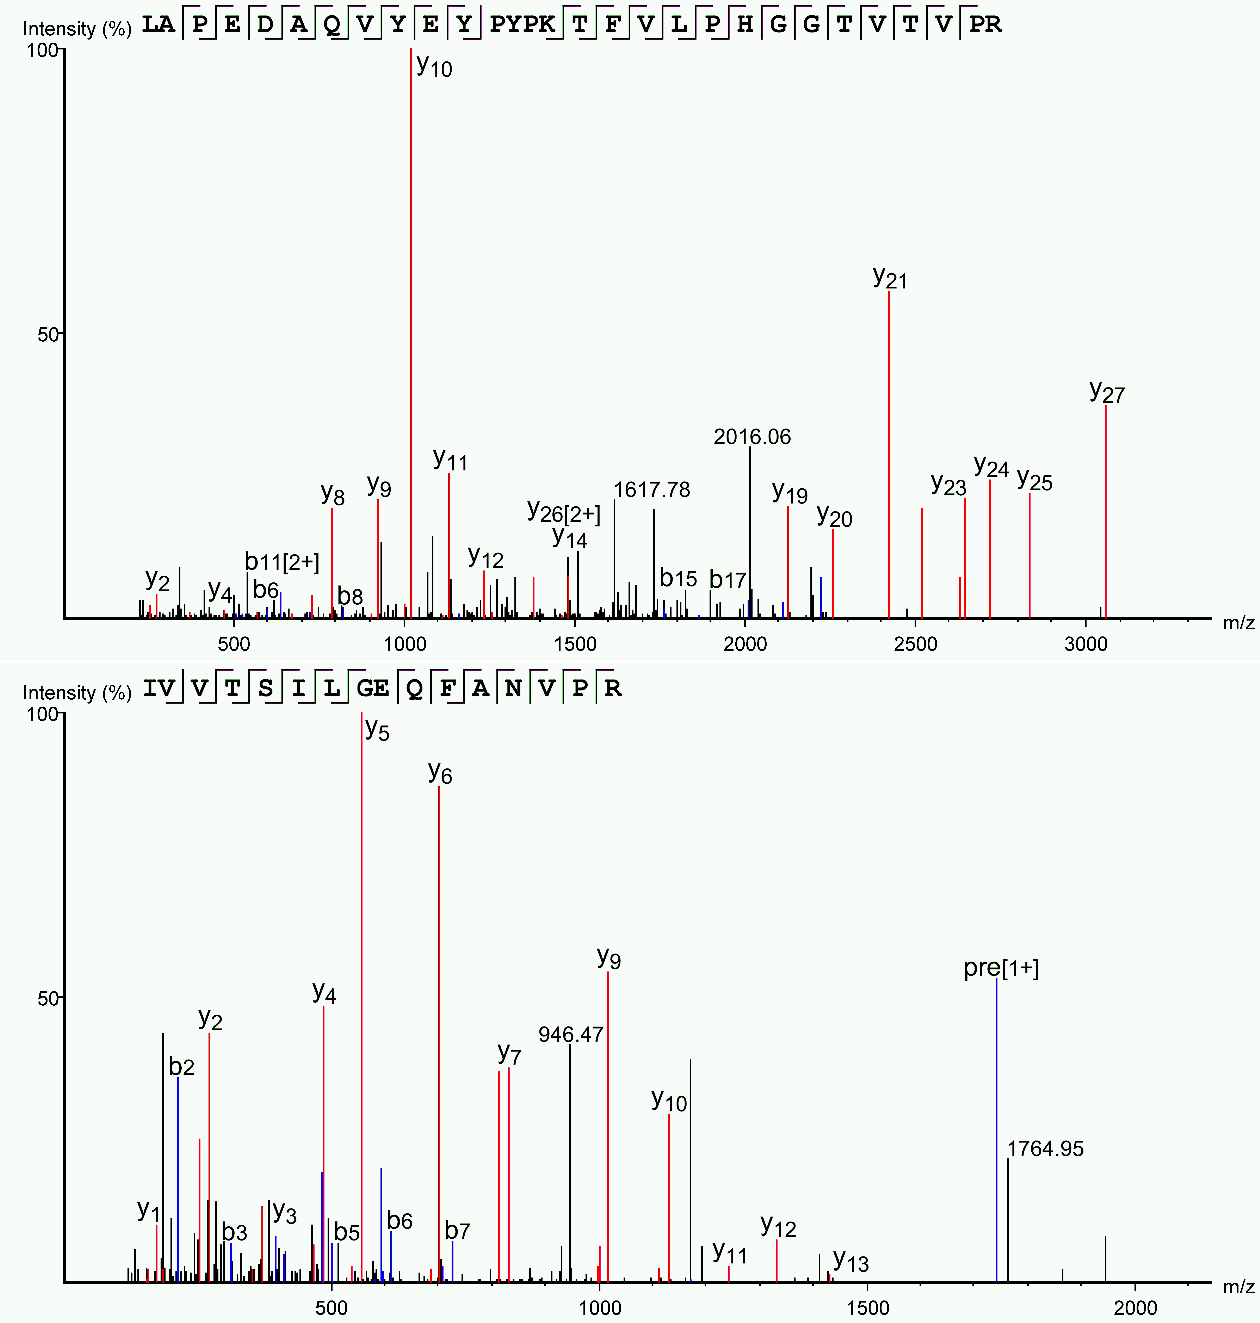


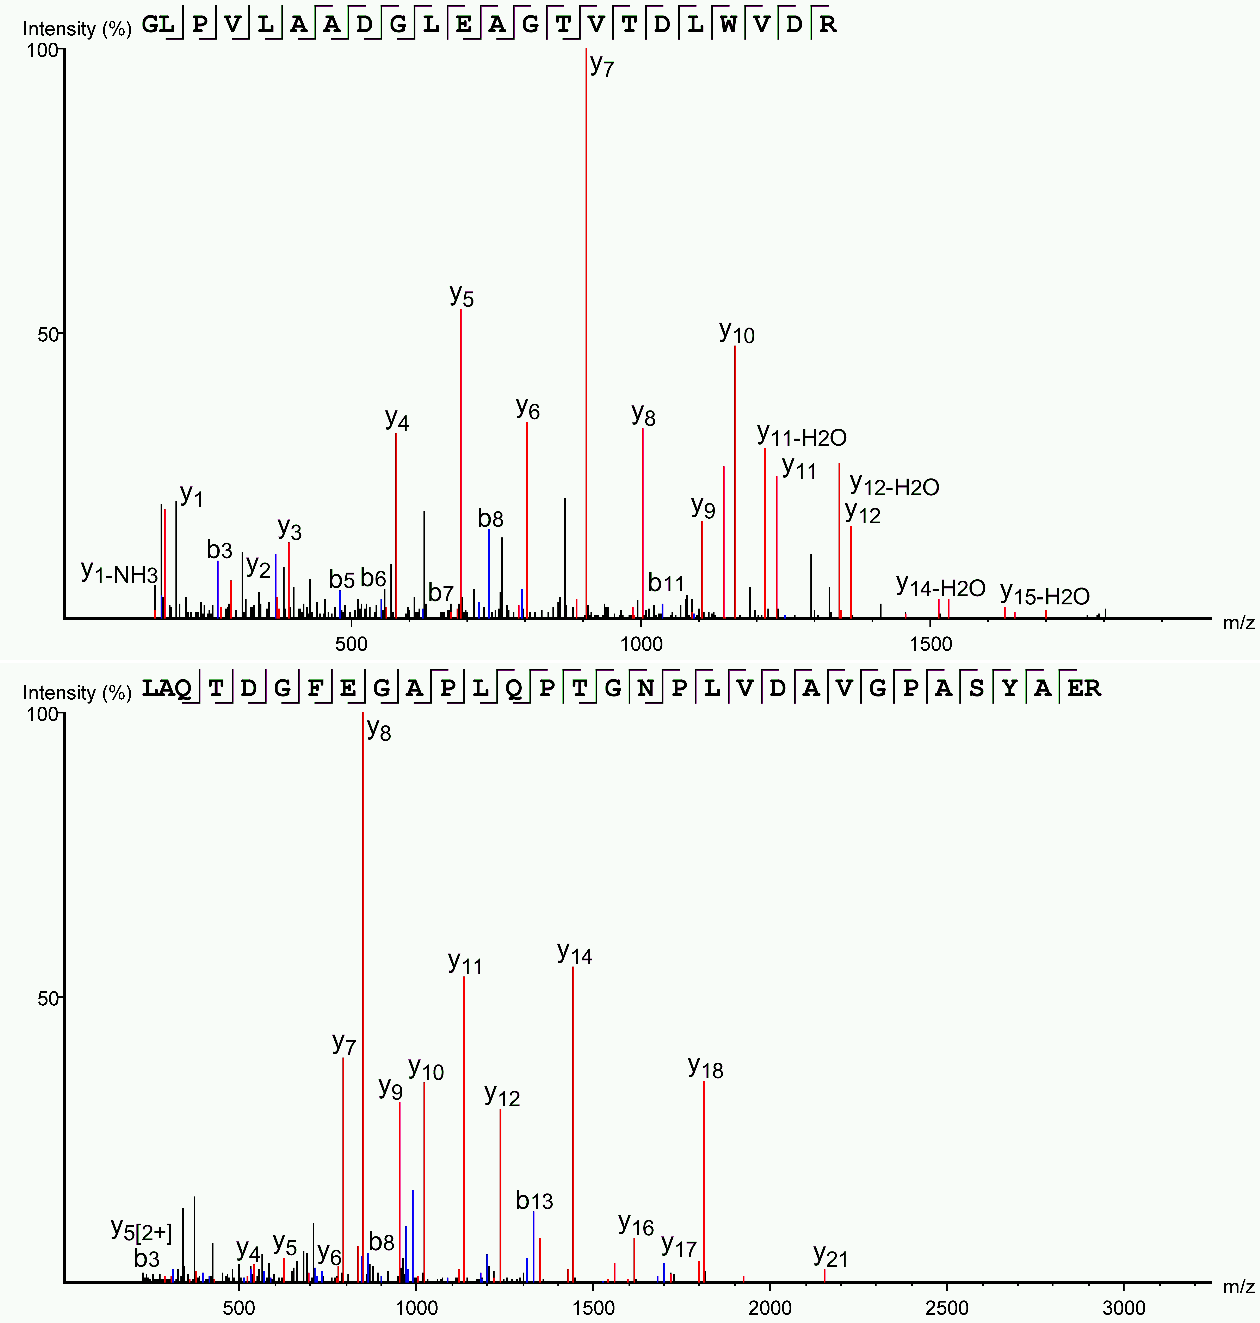


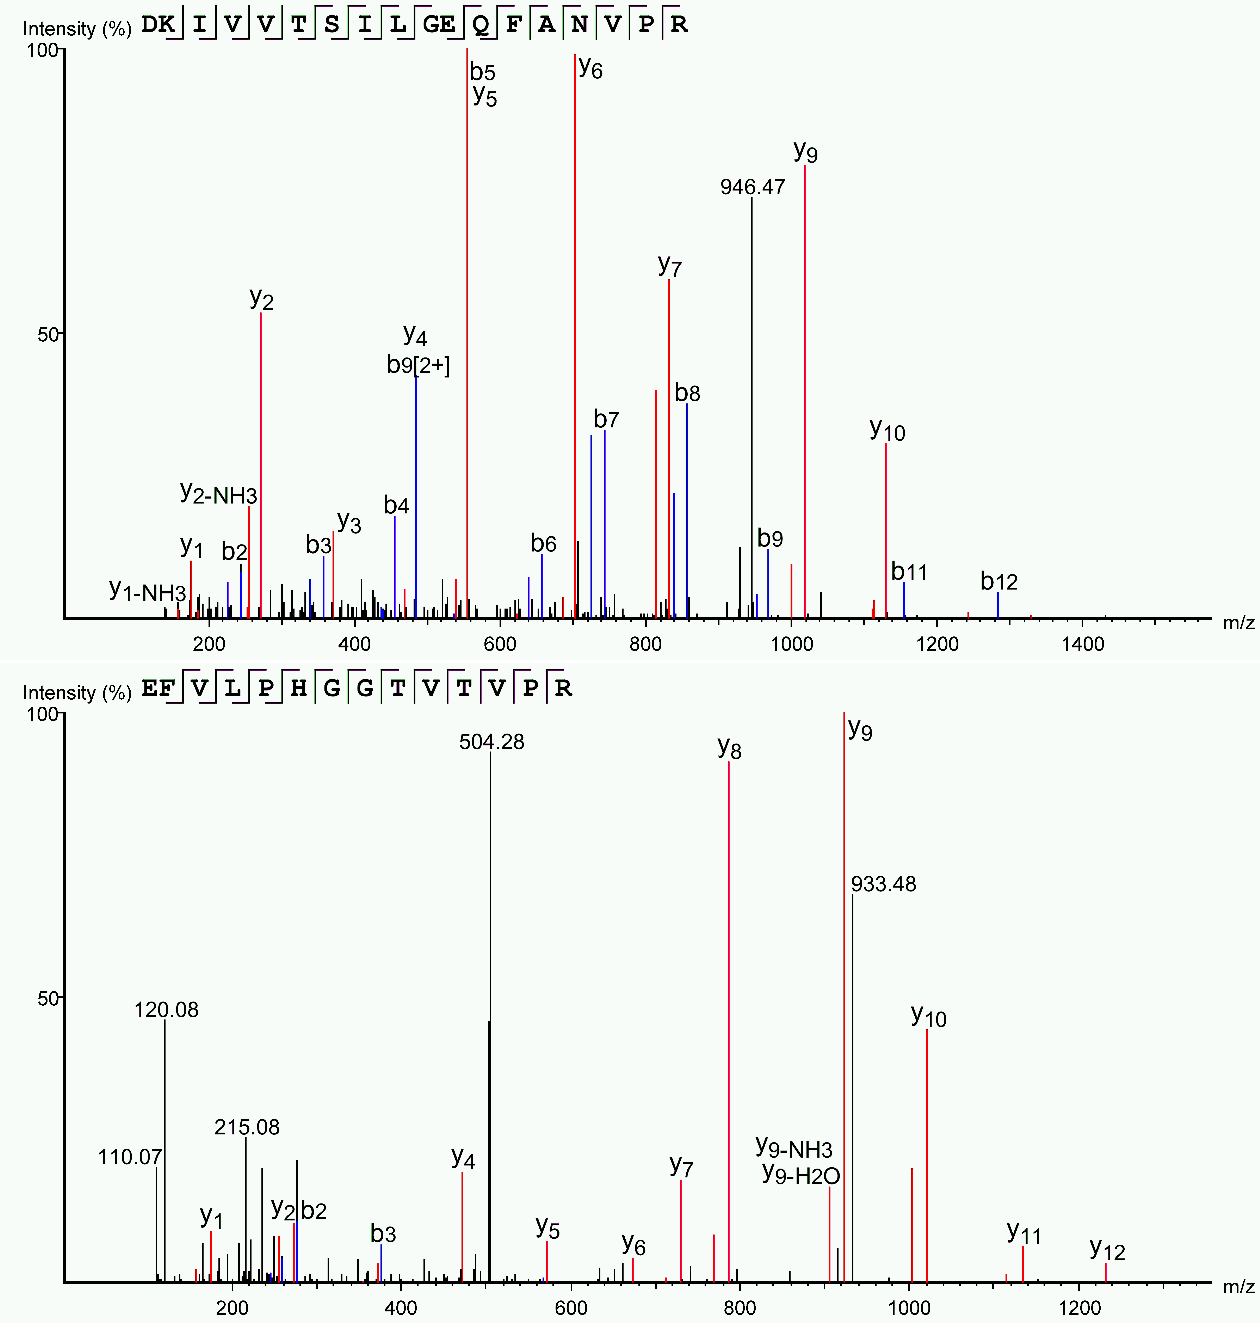


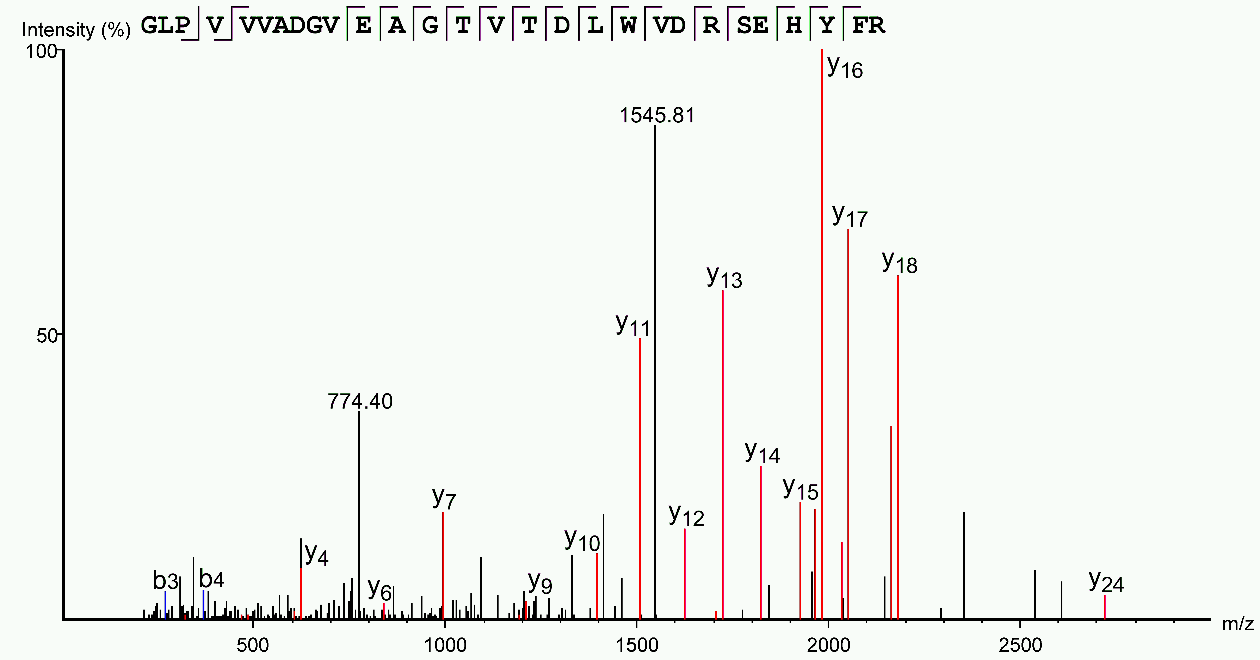


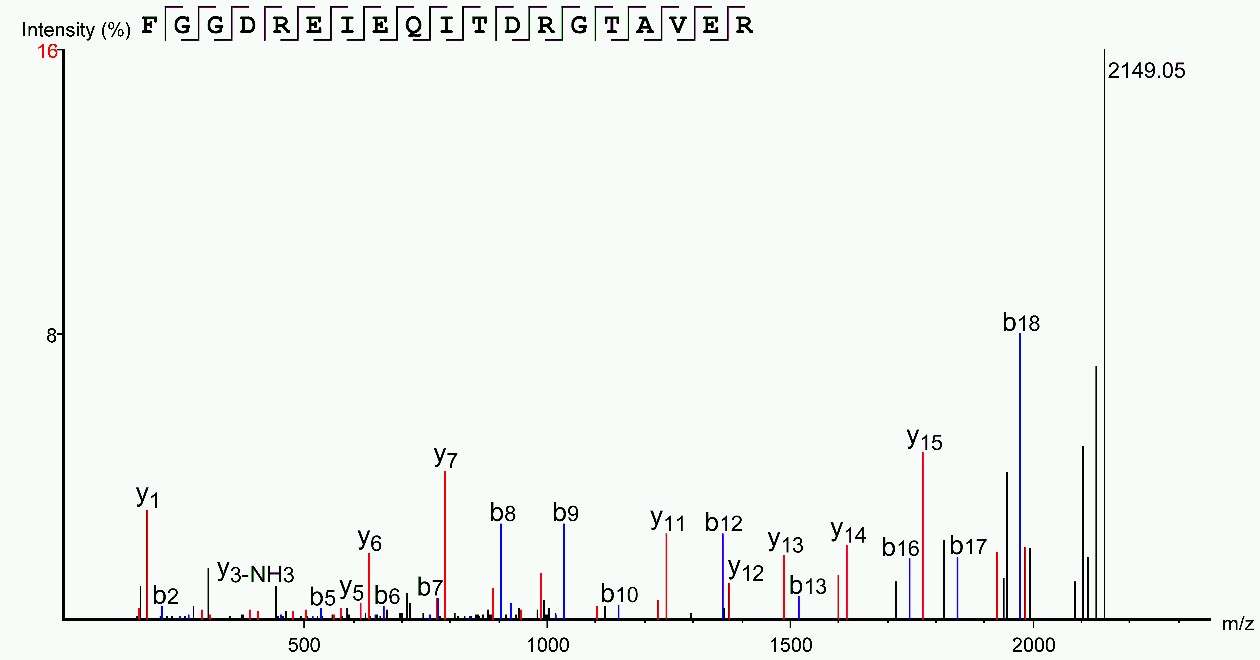


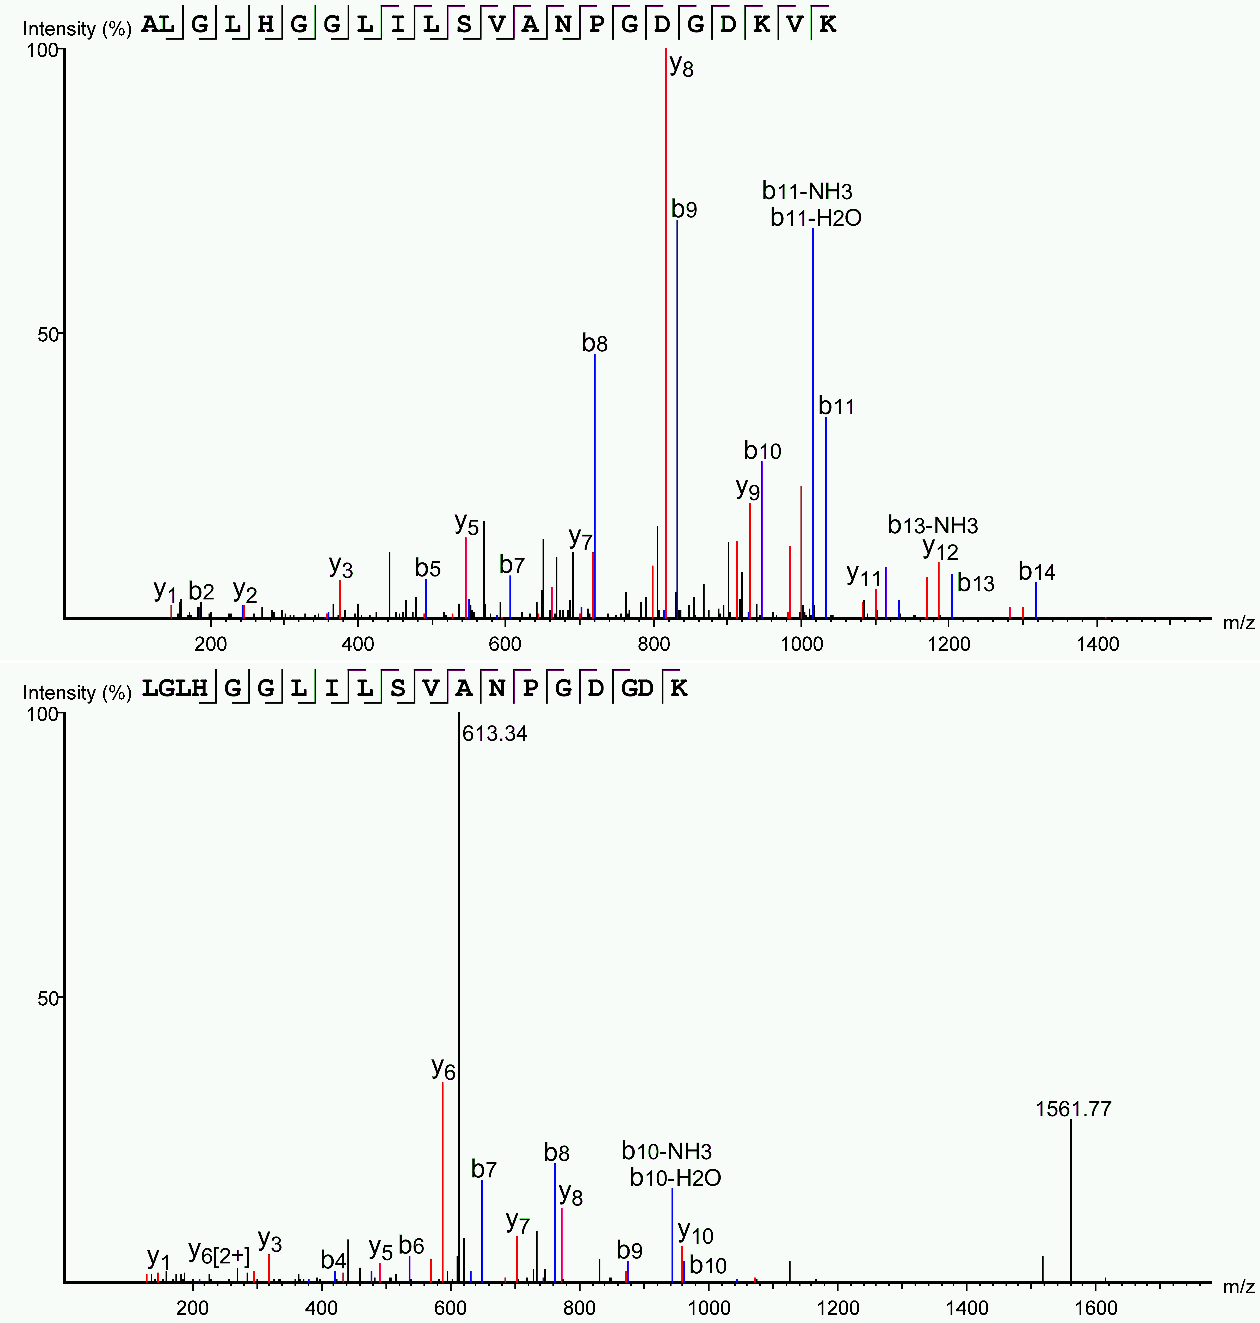


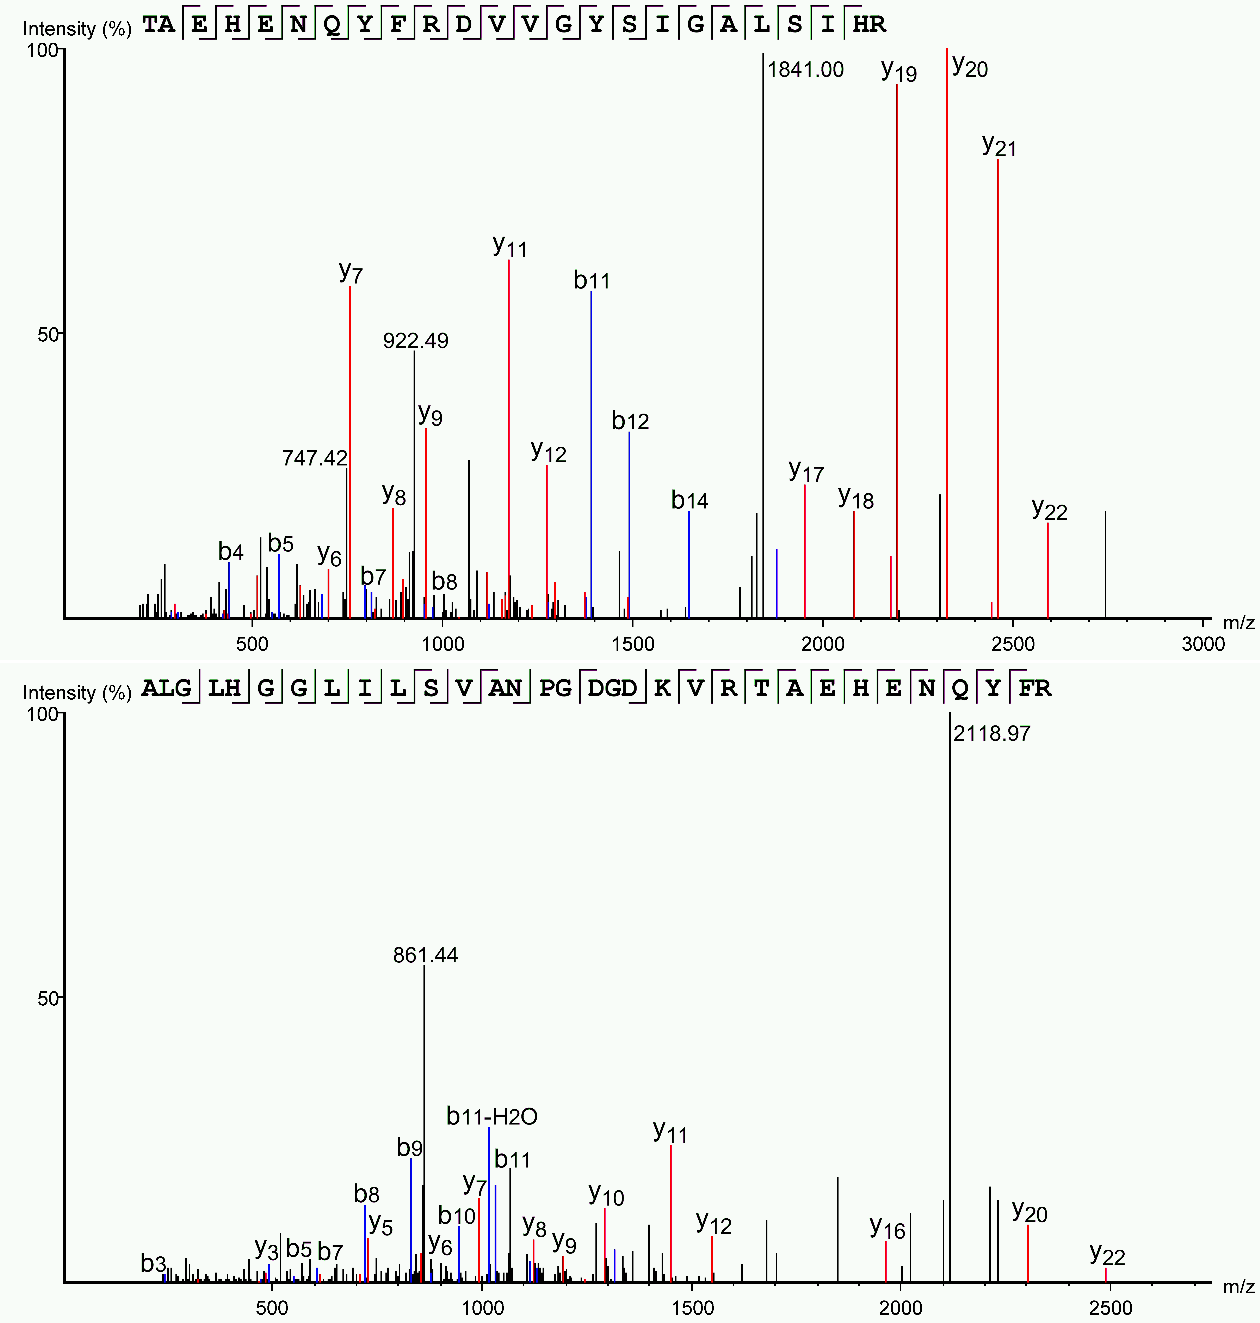


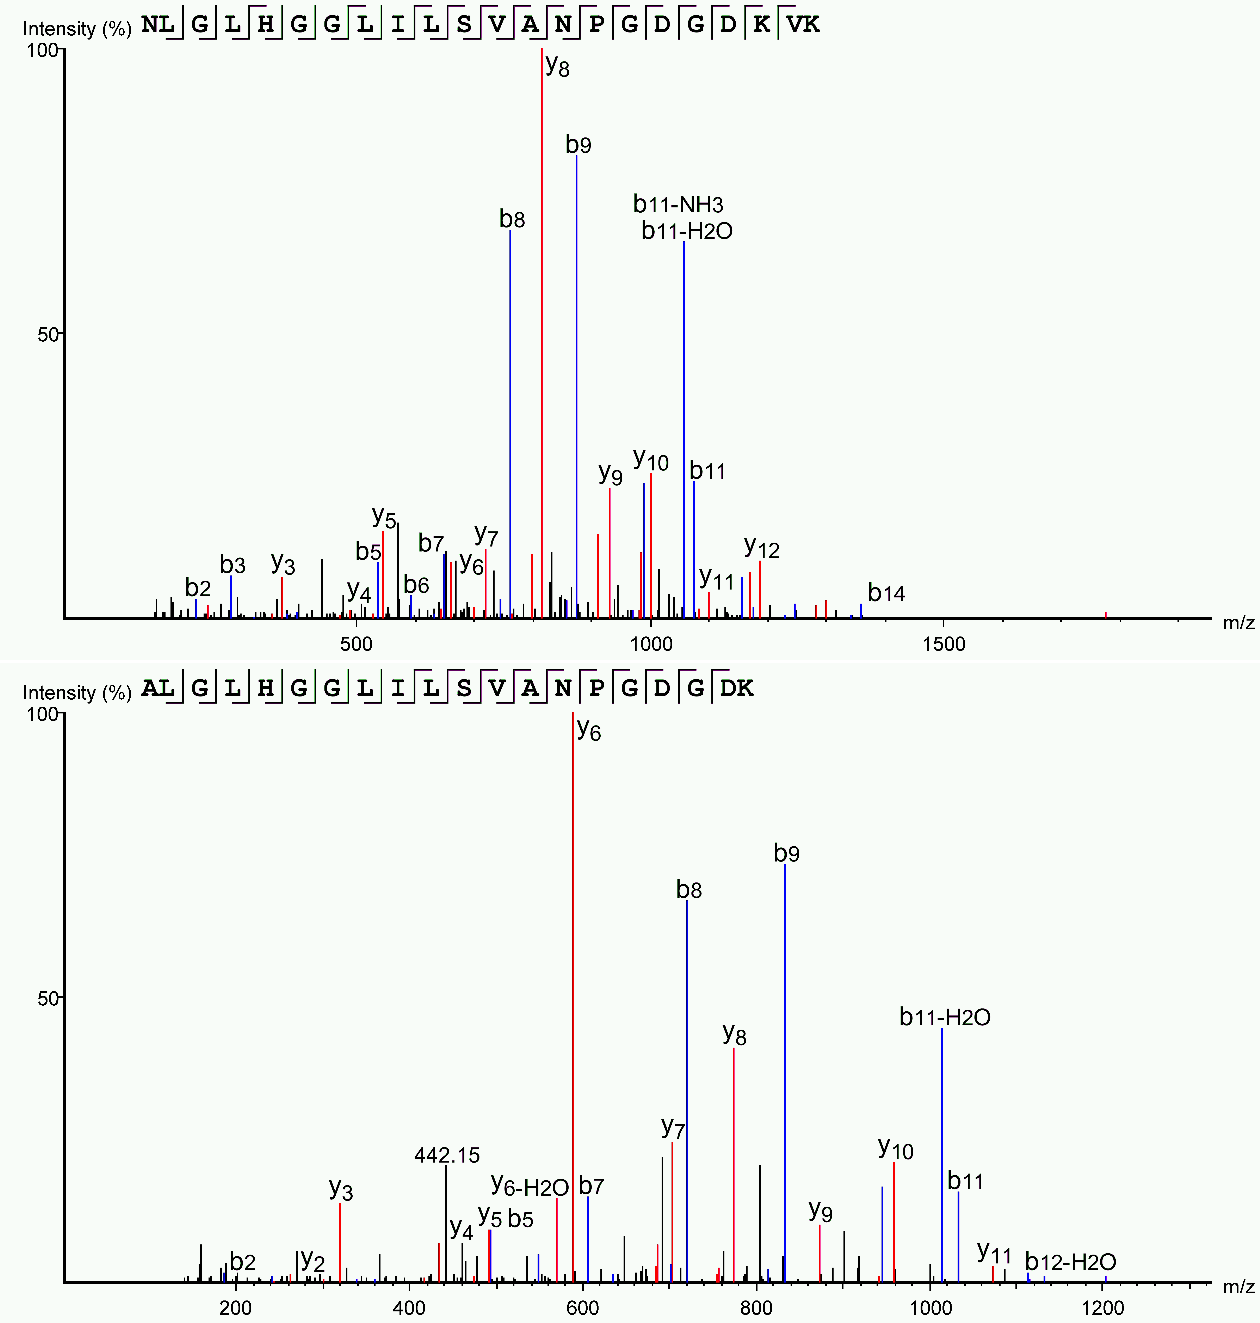


**Figure S2. Product-ion (MS/MS) spectra of de novo tag of C-terminal on M subunit. The fragment ion assignment was performed by using PEAKS software.**


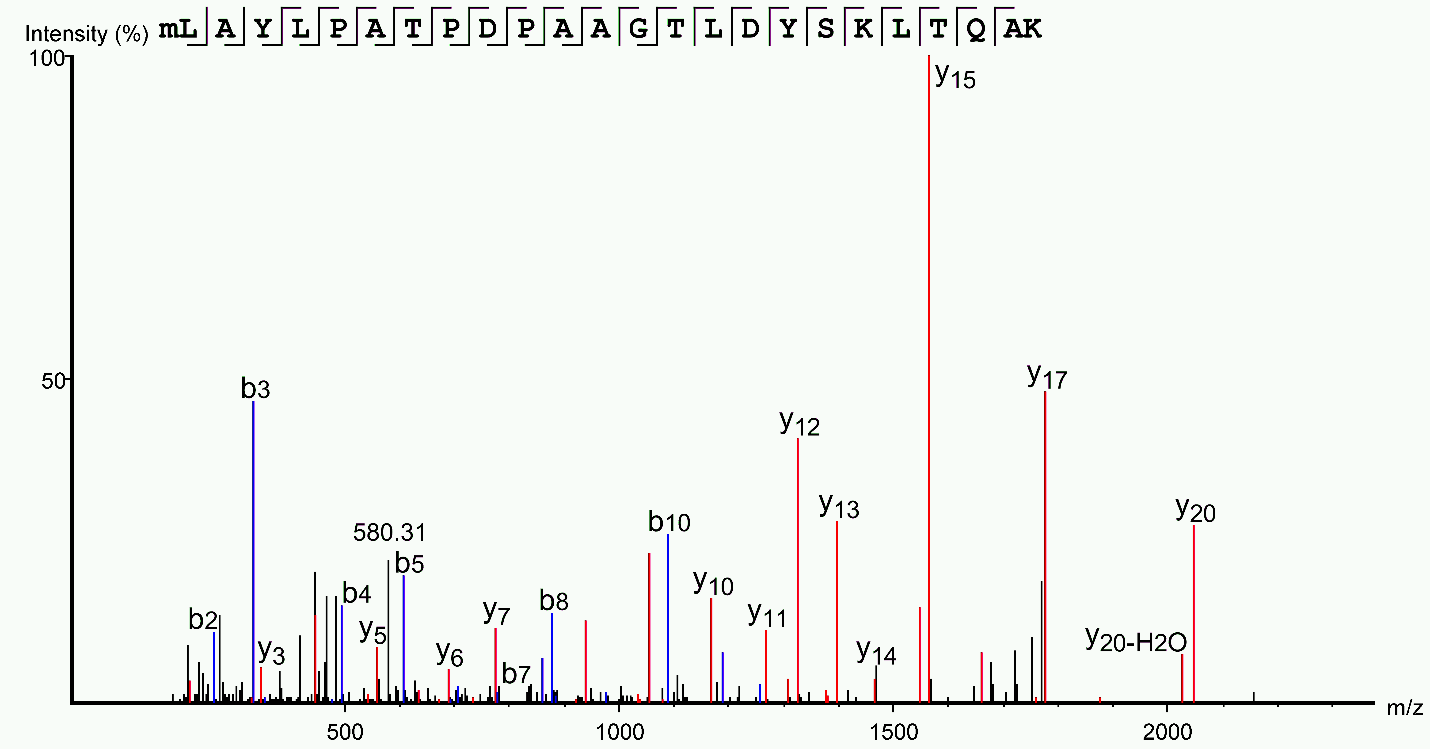


**Figure S3. Protein coverage map generated by PEAKS software. (a) P06008|RCEH_BLAVI (b) P06009|RCEL_BLAVI (c) P07173|CYCR_BLAVI (d) P07173|CYCR_BLAVI**

**(a)**


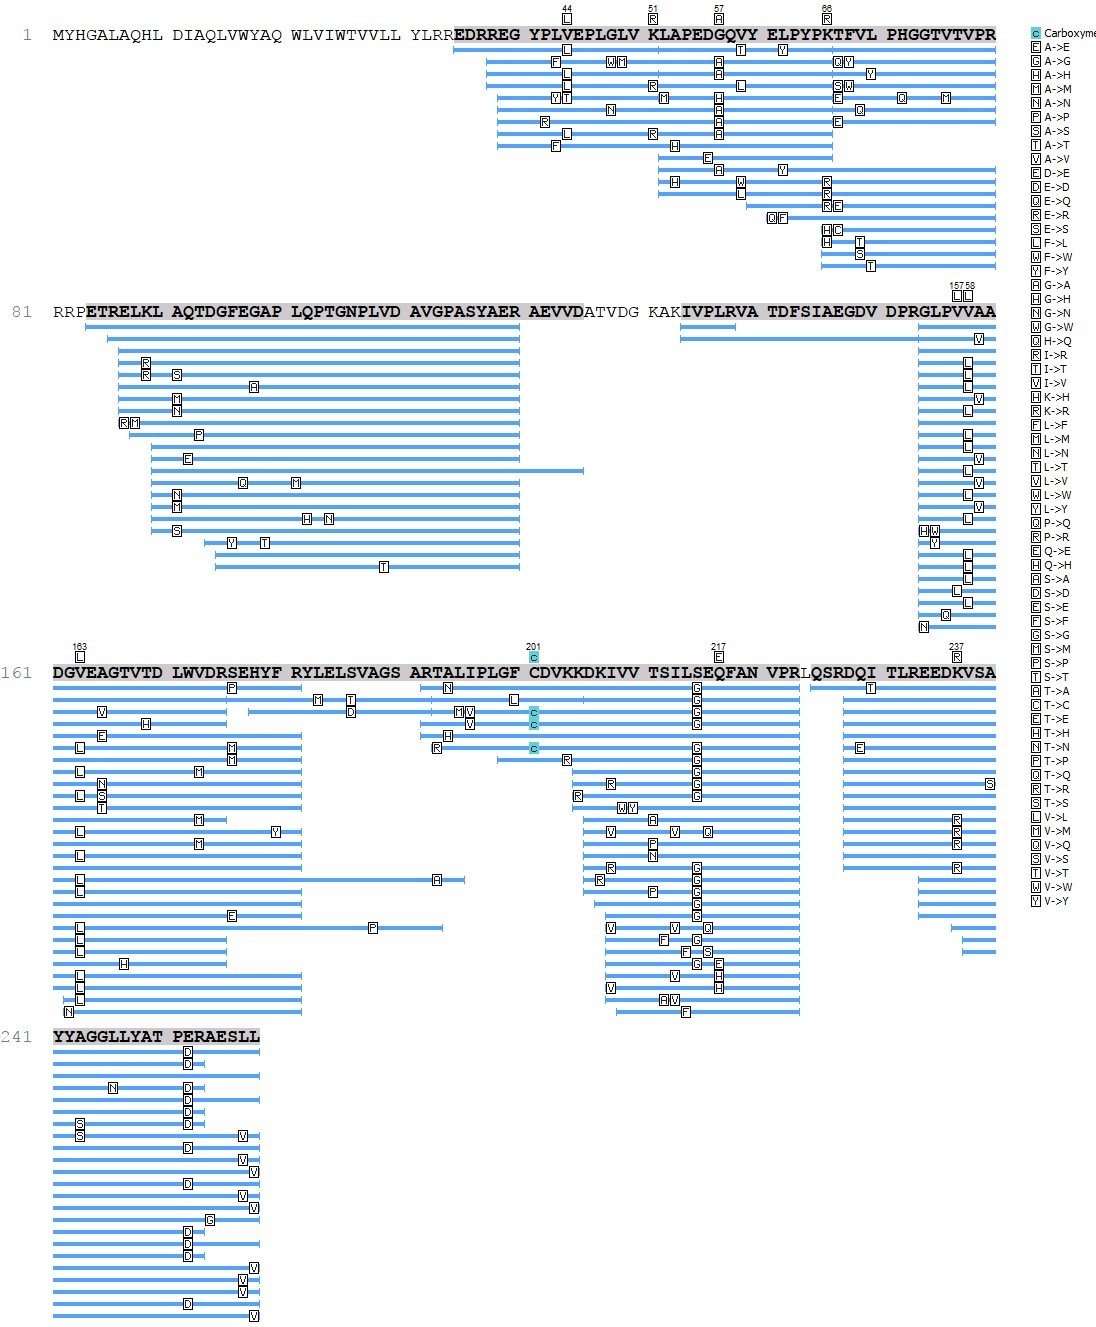


**(b)**


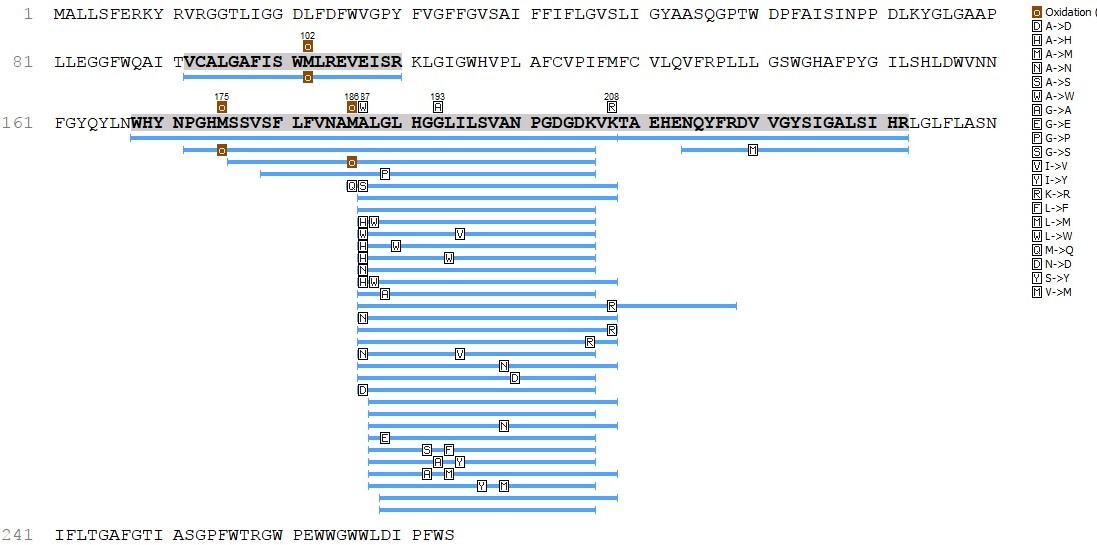


**(c)**

|  |  |  |  |  |  |  |  |  |  |  |  |  |
| --- | --- | --- | --- | --- | --- | --- | --- | --- | --- | --- | --- | --- |
|  |  |  |  |  |  |  |  |  |  |  |  |  |
|  |  |  |  |  |  |  |  |  |  |  |  |  |


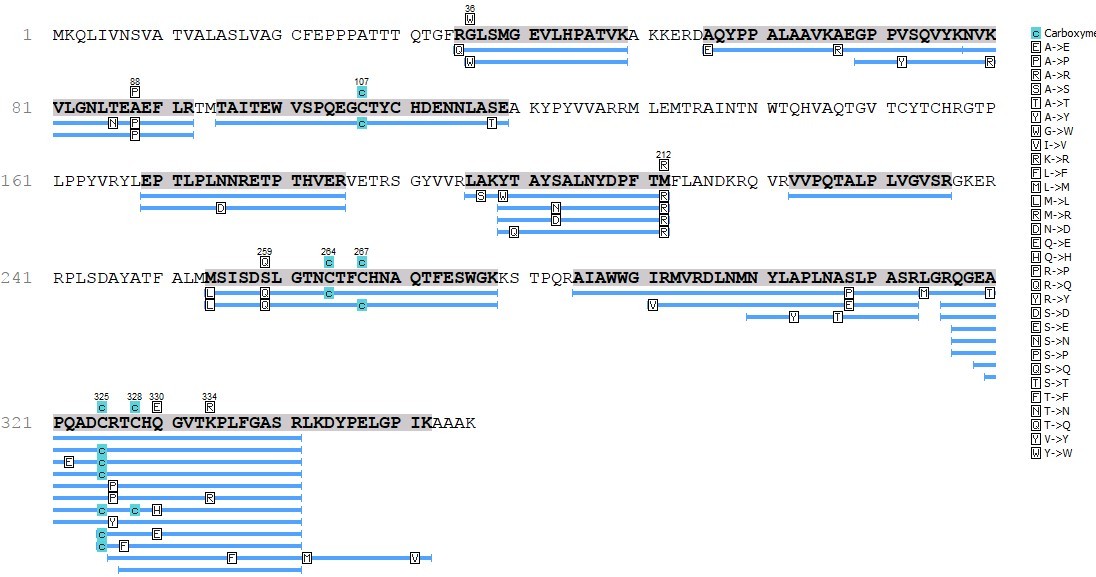


**(d)**

**Table S1. Protein lists generated by PEAKS software**

**Table S2. Theoretical MW, experimental MW and pigment component for all the peaks series identified in figure 4a (a) and 4b (b).**

**(a)**


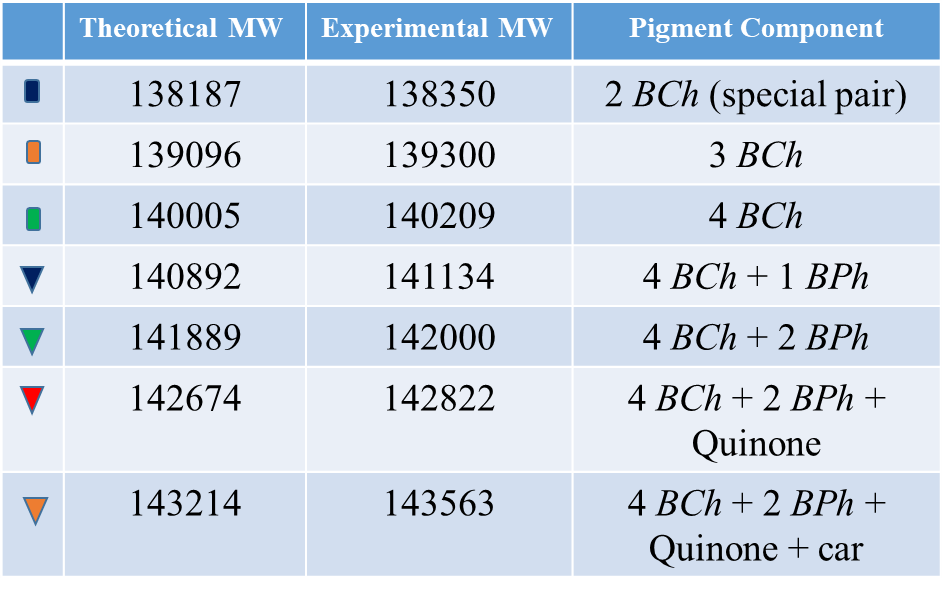


**(b)**


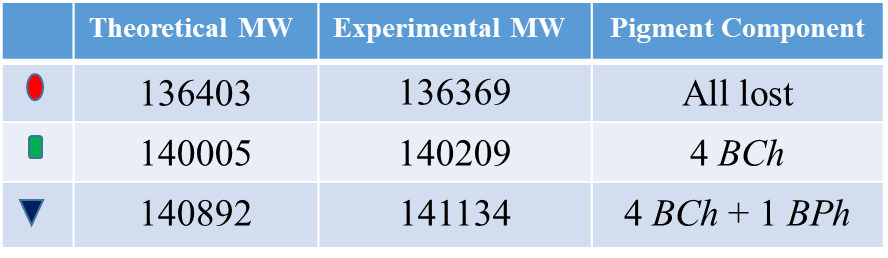


(b)
